# Supplementary material for: T-bet and Eomes instruct the development of two distinct natural killer cell lineages in the liver and in the bone marrow
Source: PubMed Central journal article supplement — J Exp Med. 2014 Mar 10;211(3):563–77. doi: 10.1084/jem.20131560 (PMC3949572; doi:10.1084/jem.20131560), 2014-03-10
Supplement: supp_jem.20131560_JEM_20131560_sm.pdf [file supp_jem.20131560_JEM_20131560_sm.pdf]

SUPPLEMENTAL MATERIAL

Daussy et al., <http://www.jem.org/cgi/content/full/jem.20131560/DC1>

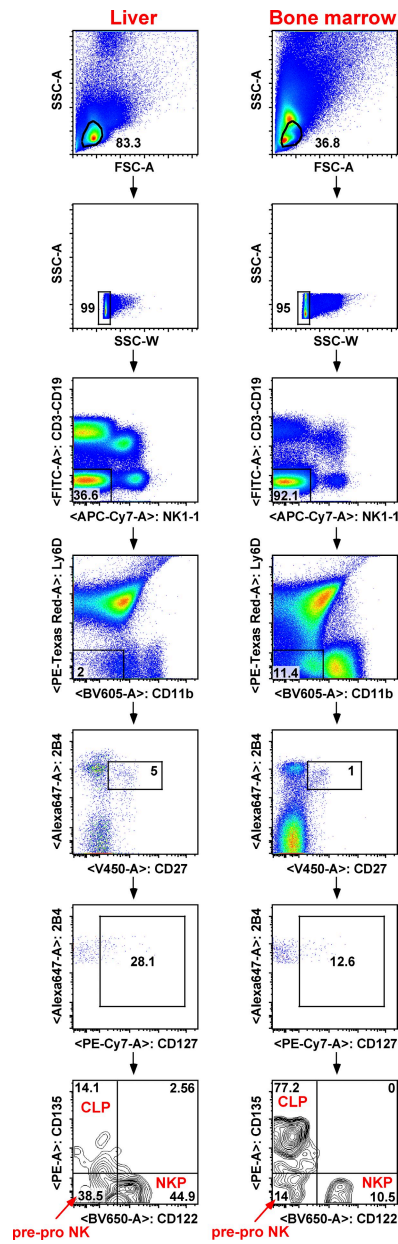

**Figure S1. Gating strategy used to identify pre-pro NK cells and NKp.** The figure shows the sequential gating strategy from top to bottom, in the BM and liver as indicated, according to Fathman et al. (2011). Data are representative of at least three independent experiments.

Table S1 is provided as a pdf.

REFERENCE

Fathman, J.W., D. Bhattacharya, M.A. Inlay, J. Seita, H. Karsunky, and I.L. Weissman. 2011. Identification of the earliest natural killer cell-committed progenitor in murine bone marrow. *Blood*. 118:5439–5447. <http://dx.doi.org/10.1182/blood-2011-04-348912>
