# Supplementary material for: T-bet and Eomes instruct the development of two distinct natural killer cell lineages in the liver and in the bone marrow
Source: PubMed Central journal article supplement — J Exp Med. 2014 Mar 10;211(3):563–77. doi: 10.1084/jem.20131560 (PMC3949572; doi:10.1084/jem.20131560), 2014-03-10
Supplement: supp_jem.20131560_JEM_20131560_TableS1.pdf [file supp_jem.20131560_JEM_20131560_TableS1.pdf]

**Table S1. Genes differentially expressed between Eomes- and Eomes+ NK cells**

| log2(fc)                  | fc    | p        | Probeset | Symbol   |
|---------------------------|-------|----------|----------|----------|
| <b>Cytotoxic function</b> |       |          |          |          |
| 4.1                       | x 17  | 1.1e-07  | 14940_at | Gzmc     |
| 2.7                       | x 6.3 | 4.00E-07 | 22035_at | Tnfsf10  |
| -3.2                      | / 9.1 | 3.6e-07  | 20706_at | Serpib9b |
| -1.2                      | / 2.4 | 7.00E-04 | 16904_at | Gzmm     |
| -1.1                      | / 2.2 | 0.0037   | 18646_at | Prf1     |
| -1.5                      | / 2.7 | 7.7e-05  | 13024_at | Ctla2a   |
| -1.0                      | / 2   | 0.0068   | 13025_at | Ctla2b   |
| -1.2                      | / 2.3 | 0.03     | 17476_at | Mpeg1    |

| <b>NK cell receptors</b> |       |         |           |        |
|--------------------------|-------|---------|-----------|--------|
| -3.9                     | / 14  | 1.5e-07 | 16639_at  | Klra8  |
| -2.8                     | / 6.9 | 0.00011 | 17228_at  | Cma1   |
| 2.6                      | x 6.3 | 0.00021 | 16636_at  | Klra5  |
| -2.6                     | / 6.2 | 0.00011 | 16638_at  | Klra7  |
| -2.5                     | / 5.7 | 1.9e-05 | 16627_at  | Klra1  |
| 1.9                      | x 3.7 | 0.00048 | 225825_at | Cd226  |
| -1.6                     | / 3.1 | 0.0026  | 50928_at  | Klrg1  |
| -1.4                     | / 2.6 | 0.00012 | 52855_at  | Lair1  |
| -1.3                     | / 2.5 | 0.0045  | 54698_at  | Crtam  |
| 1.1                      | x 2.2 | 3.5e-05 | 80782_at  | Klrb1b |
| -1.1                     | / 2.1 | 0.042   | 16637_at  | Klra6  |

| <b>Other cell surface receptors</b> |       |          |              |          |
|-------------------------------------|-------|----------|--------------|----------|
| 2.9                                 | x 7.4 | 1.4e-07  | 57781_at     | Cd200r1  |
| 2.8                                 | x 7.1 | 4.8e-07  | 107576_at    | TcrG-C4  |
| 2.7                                 | x 6.7 | 5.9e-05  | 65963_at     | Tmem176b |
| 2.7                                 | x 6.5 | 2.6e-05  | 66058_at     | Tmem176a |
| -2.0                                | / 4   | 4.5e-06  | 13136_at     | Cd55     |
| -1.8                                | / 3.5 | 2.3e-06  | 14130_at     | Fcgr2b   |
| 1.9                                 | x 3.7 | 0.0018   | 100125255_at | Trbj2-1  |
| 2.0                                 | x 4   | 5.5e-06  | 67168_at     | Lpar6    |
| 1.7                                 | x 3.3 | 5.5e-06  | 382045_at    | Gpr114   |
| 1.6                                 | x 3.1 | 1.6e-06  | 54215_at     | Cd160    |
| 1.4                                 | x 2.7 | 6.5e-05  | 58205_at     | Pdcd1lg2 |
| 1.4                                 | x 2.7 | 1.3e-05  | 16768_at     | Lag3     |
| 1.4                                 | x 2.6 | 1.6e-05  | 101883_at    | Igflr1   |
| 1.3                                 | x 2.5 | 0.00044  | 320782_at    | Tmem154  |
| 1.3                                 | x 2.5 | 0.00035  | 85030_at     | Tnfrsf25 |
| -1.2                                | / 2.3 | 0.0013   | 246746_at    | Cd300lf  |
| 1.2                                 | x 2.2 | 0.00012  | 12516_at     | Cd7      |
| 1.1                                 | x 2.2 | 6.00E-05 | 50723_at     | Icosl    |
| 1.1                                 | x 2.2 | 9.7e-05  | 21949_at     | Tnfsf8   |

| log2(fc)              | fc    | p       | Probeset  | Symbol   |
|-----------------------|-------|---------|-----------|----------|
| <b>Innate sensors</b> |       |         |           |          |
| 2.7                   | x 6.4 | 2.3e-05 | 18439_at  | P2rx7    |
| 2.7                   | x 6.4 | 3.2e-05 | 11872_at  | Art2b    |
| 1.7                   | x 3.2 | 3.2e-07 | 56318_at  | Acpp     |
| -1.6                  | / 3.1 | 2.6e-05 | 226861_at | Hhat     |
| 1.6                   | x 2.9 | 1.4e-07 | 12494_at  | Cd38     |
| 1.4                   | x 2.7 | 0.00024 | 11871_at  | Art2a-ps |
| 1.1                   | x 2.1 | 0.00048 | 57757_at  | Pglyrp2  |
| 1.1                   | x 2.1 | 3.4e-05 | 384059_at | Tlr12    |

| <b>cytokines, cytokine receptors and signalling</b> |       |         |           |         |
|-----------------------------------------------------|-------|---------|-----------|---------|
| 2.0                                                 | x 4.2 | 0.00013 | 16183_at  | Il2     |
| 2.5                                                 | x 5.7 | 9.2e-06 | 216233_at | Socs2   |
| 2.2                                                 | x 4.7 | 3.1e-05 | 12700_at  | Cish    |
| 1.7                                                 | x 3.2 | 0.0019  | 16197_at  | Il7r    |
| 1.1                                                 | x 2.2 | 0.0031  | 16994_at  | Ltb     |
| 1.1                                                 | x 2.2 | 3.2e-05 | 60504_at  | Il21r   |
| -1.1                                                | / 2.2 | 0.0026  | 16174_at  | Il18rap |
| -1.1                                                | / 2.1 | 0.00045 | 16182_at  | Il18r1  |
| 1.1                                                 | x 2.1 | 0.00015 | 21812_at  | Tgfr1   |
| 0.93                                                | x 1.9 | 0.00011 | 16452_at  | Jak2    |
| 0.91                                                | x 1.9 | 0.0026  | 21926_at  | Tnf     |
| 0.9                                                 | x 1.9 | 0.0079  | 16161_at  | Il12rb1 |
| 0.79                                                | x 1.7 | 0.00016 | 171463_at | Il17rd  |
| 0.85                                                | x 1.8 | 0.00034 | 16963_at  | Xcl1    |

| <b>secreted proteins</b> |       |          |           |        |
|--------------------------|-------|----------|-----------|--------|
| 1.6                      | x 3   | 0.00055  | 20198_at  | S100a4 |
| 1.3                      | x 2.5 | 7.4e-06  | 214968_at | Sema6d |
| 1.3                      | x 2.5 | 0.00099  | 58809_at  | Rnase4 |
| -1.2                     | / 2.3 | 0.001    | 16952_at  | Anxa1  |
| -1.2                     | / 2.3 | 0.00067  | 22341_at  | Vegfc  |
| -1.1                     | / 2.2 | 5.00E-04 | 68169_at  | Ndnf   |
| -1.2                     | / 2.3 | 0.0042   | 329941_at | Col8a2 |
| 1.1                      | x 2.1 | 0.00085  | 14190_at  | Fgl2   |
| -1.2                     | / 2.3 | 0.0062   | 53614_at  | Reck   |

| <b>Notch signalling</b> |       |         |          |       |
|-------------------------|-------|---------|----------|-------|
| 2.4                     | x 5.4 | 0.00013 | 65256_at | Asb2  |
| 1.9                     | x 3.8 | 6.9e-05 | 14357_at | Dtx1  |
| -1.9                    | / 3.8 | 1.1e-06 | 67122_at | Nrarp |
| 1.6                     | x 3.1 | 1.9e-06 | 19664_at | Rbpj  |
| 1.1                     | x 2.1 | 0.00019 | 13388_at | Dll1  |

| log2(fc)                   | fc    | p      | Probeset | Symbol |
|----------------------------|-------|--------|----------|--------|
| <b>protease inhibitors</b> |       |        |          |        |
| 1.2                        | x 2.2 | 0.0014 | 69993_at | Chn2   |

| <b>ROS production</b> |       |         |          |       |
|-----------------------|-------|---------|----------|-------|
| 1.3                   | x 2.4 | 1.4e-06 | 17969_at | Ncf1  |
| 1.2                   | x 2.3 | 0.00011 | 74096_at | Hvcn1 |

| <b>Signalling</b> |       |          |           |        |
|-------------------|-------|----------|-----------|--------|
| -2.8              | / 7.1 | 3.5e-06  | 20400_at  | Sh2d1a |
| 2.6               | x 6   | 4.7e-05  | 12502_at  | Cd3g   |
| -1.9              | / 3.7 | 0.00098  | 20393_at  | Sgk1   |
| -1.8              | / 3.5 | 5.4e-08  | 72446_at  | Prr5l  |
| -1.5              | / 2.8 | 6.3e-05  | 104175_at | Sbk1   |
| -1.4              | / 2.7 | 0.0011   | 20148_at  | Dhrs3  |
| -1.4              | / 2.7 | 3.4e-05  | 71592_at  | Pogk   |
| 1.4               | x 2.7 | 0.0027   | 110095_at | Pygl   |
| 1.4               | x 2.6 | 3.00E-05 | 67603_at  | Dusp6  |
| -1.4              | / 2.6 | 5.00E-05 | 19414_at  | Rasa3  |
| 1.3               | x 2.5 | 0.00021  | 64214_at  | Rgs18  |
| 1.3               | x 2.5 | 0.034    | 19271_at  | Ptprj  |
| 1.3               | x 2.5 | 0.00026  | 66610_at  | Abi3   |
| 1.2               | x 2.3 | 0.00016  | 93692_at  | Glrx   |
| 1.1               | x 2.2 | 6.4e-07  | 50778_at  | Rgs1   |
| -1.1              | / 2.2 | 0.00024  | 76469_at  | Cmya5  |
| 1.1               | x 2.2 | 2.8e-05  | 19679_at  | Pitpm2 |
| 1.1               | x 2.2 | 4.2e-05  | 102278_at | Cpne7  |
| 1.1               | x 2.1 | 0.00012  | 320495_at | Ipcef1 |
| 1.1               | x 2.1 | 0.0013   | 19730_at  | Ralgds |
| 1.1               | x 2.1 | 4.5e-05  | 19271_at  | Ptprj  |

| <b>Glycosylation and other protein modifications</b> |       |         |          |            |
|------------------------------------------------------|-------|---------|----------|------------|
| 1.1                                                  | x 2.1 | 9.5e-05 | 20447_at | St6galnac3 |
| 1.1                                                  | x 2.1 | 0.00032 | 70536_at | Qpct       |
| -2.0                                                 | / 4   | 1.4e-07 | 12763_at | Cmah       |

| <b>Proteases</b> |       |         |           |          |
|------------------|-------|---------|-----------|----------|
| -3.2             | / 9.1 | 3.6e-07 | 20706_at  | Serpib9b |
| 2.7              | x 6.3 | 4.8e-06 | 11492_at  | Adam19   |
| 2.4              | x 5.4 | 5.7e-06 | 259277_at | Klk8     |
| -2.3             | / 4.8 | 0.0088  | 17105_at  | Lyz2     |
| 1.7              | x 3.2 | 5.5e-05 | 11501_at  | Adam8    |
| -1.6             | / 3.1 | 5.9e-05 | 229697_at | Cym      |
| -1.6             | / 3.1 | 0.00033 | 13040_at  | Ctss     |
| 1.1              | x 2.2 | 5.7e-05 | 13929_at  | Amz2     |
